# Supplementary material for: Ecological Niche Modeling of Water Lily (Nymphaea L.) Species in Australia under Climate Change to Ascertain Habitat Suitability for Conservation Measures
Source: MDPI journal article supplement (doi:10.3390/plants11141874), 2022-07-19
Supplement: s1 [file s1]

Figure S1–Figure S14. The potential distribution change of 14 *Nymphaea* species for the past and future projection scenarios.

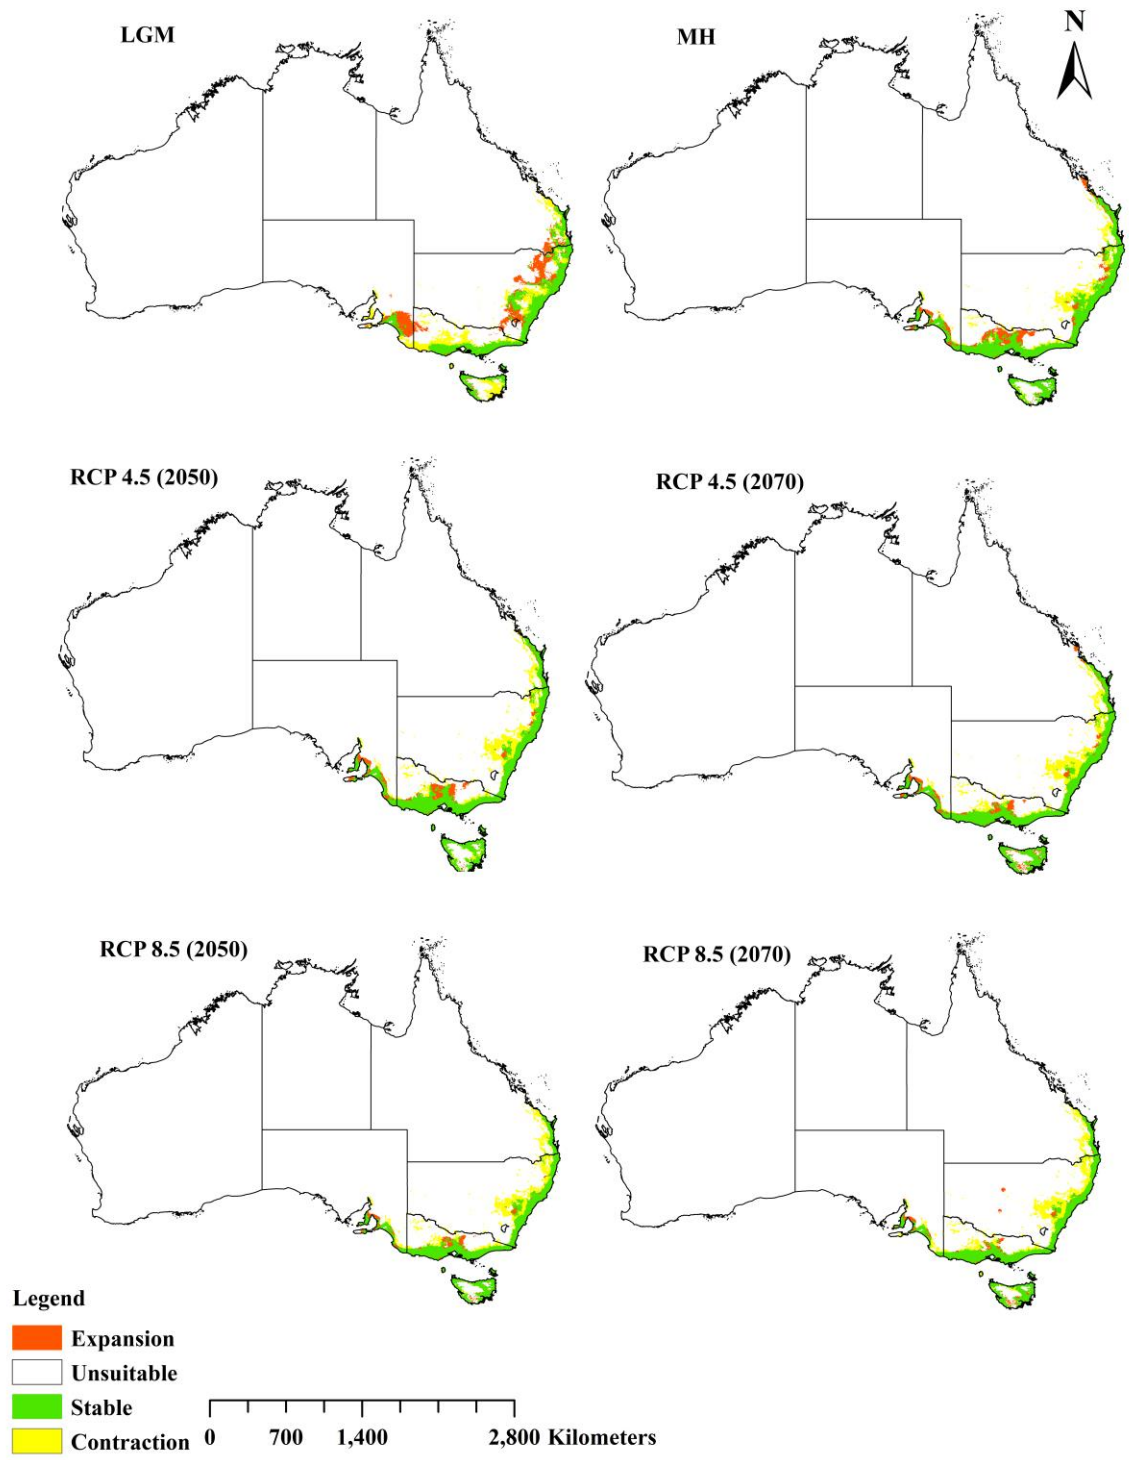

Figure S1. *N. alb.*

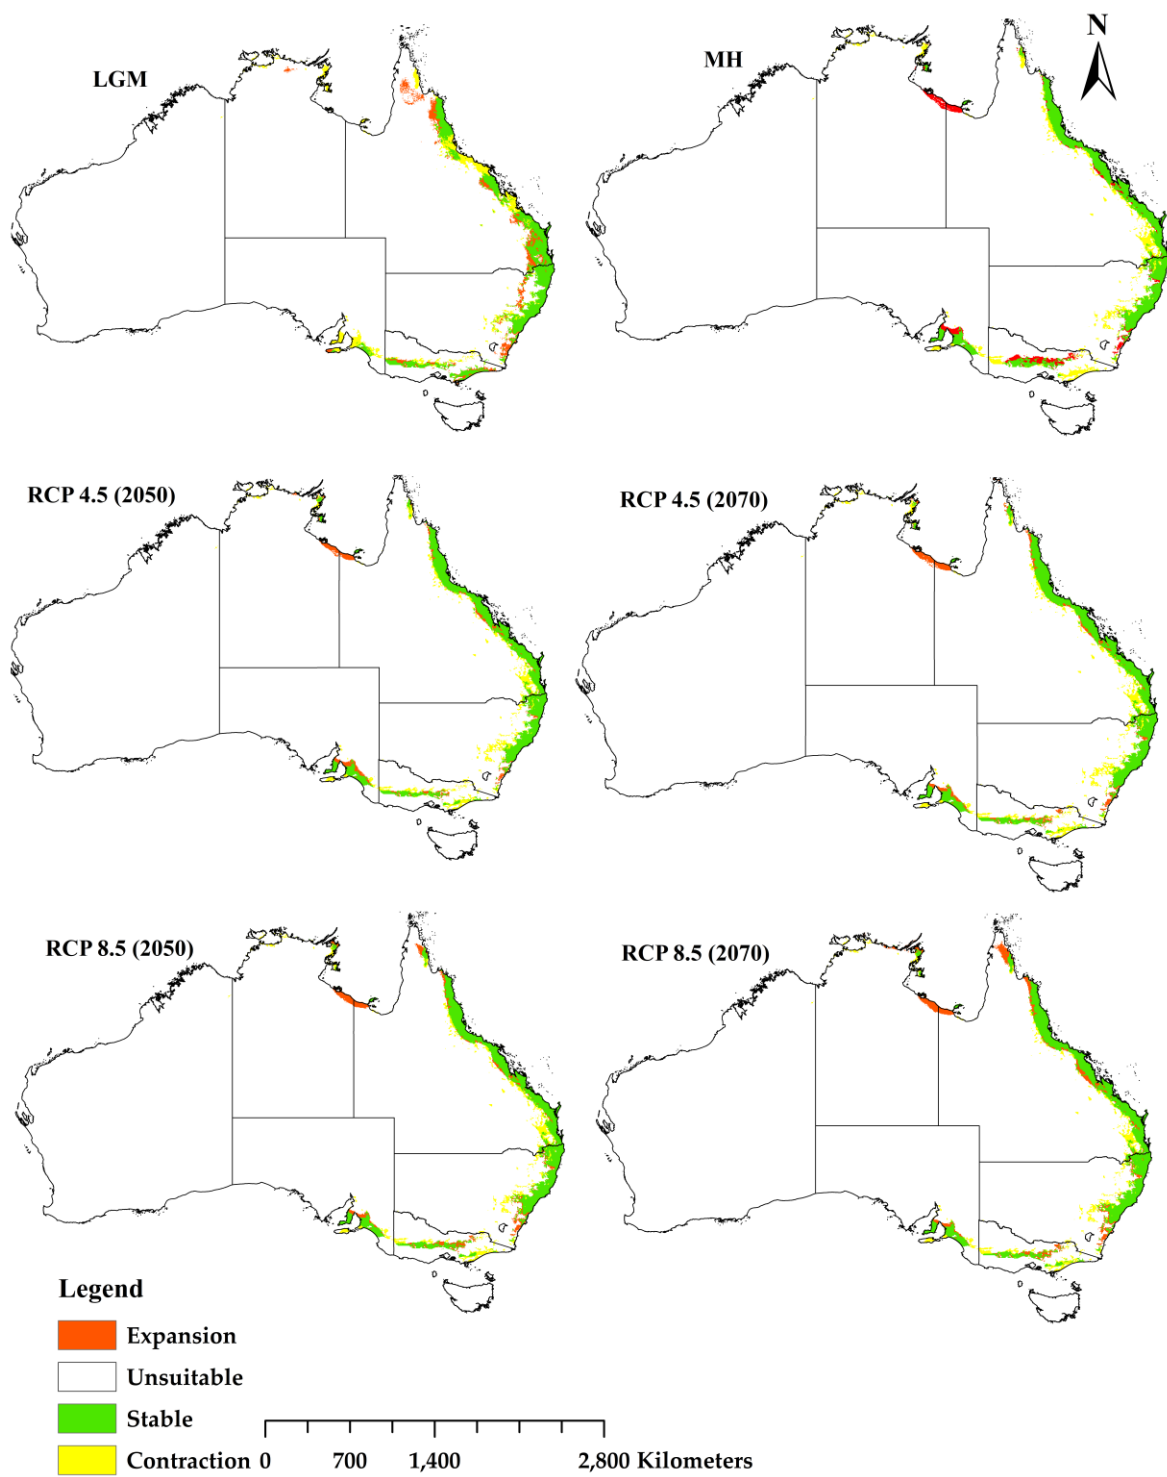

**Figure S2.** *N. nouchali*.

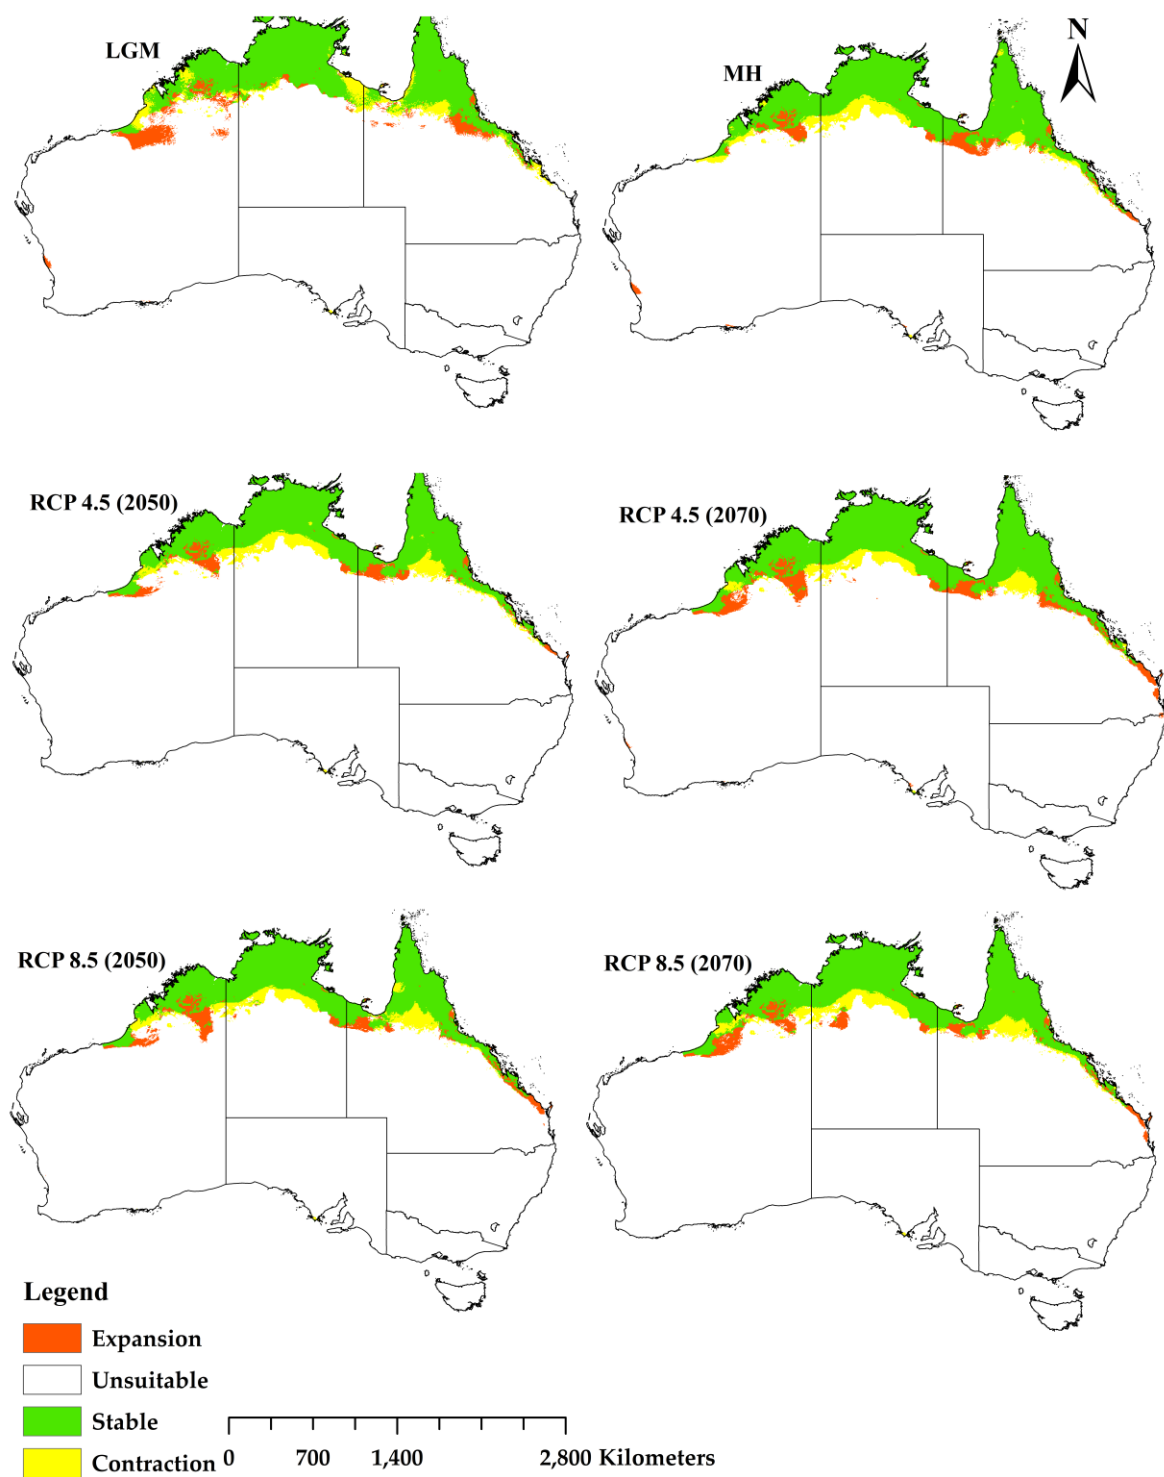

**Figure S3.** *N. violancea*.

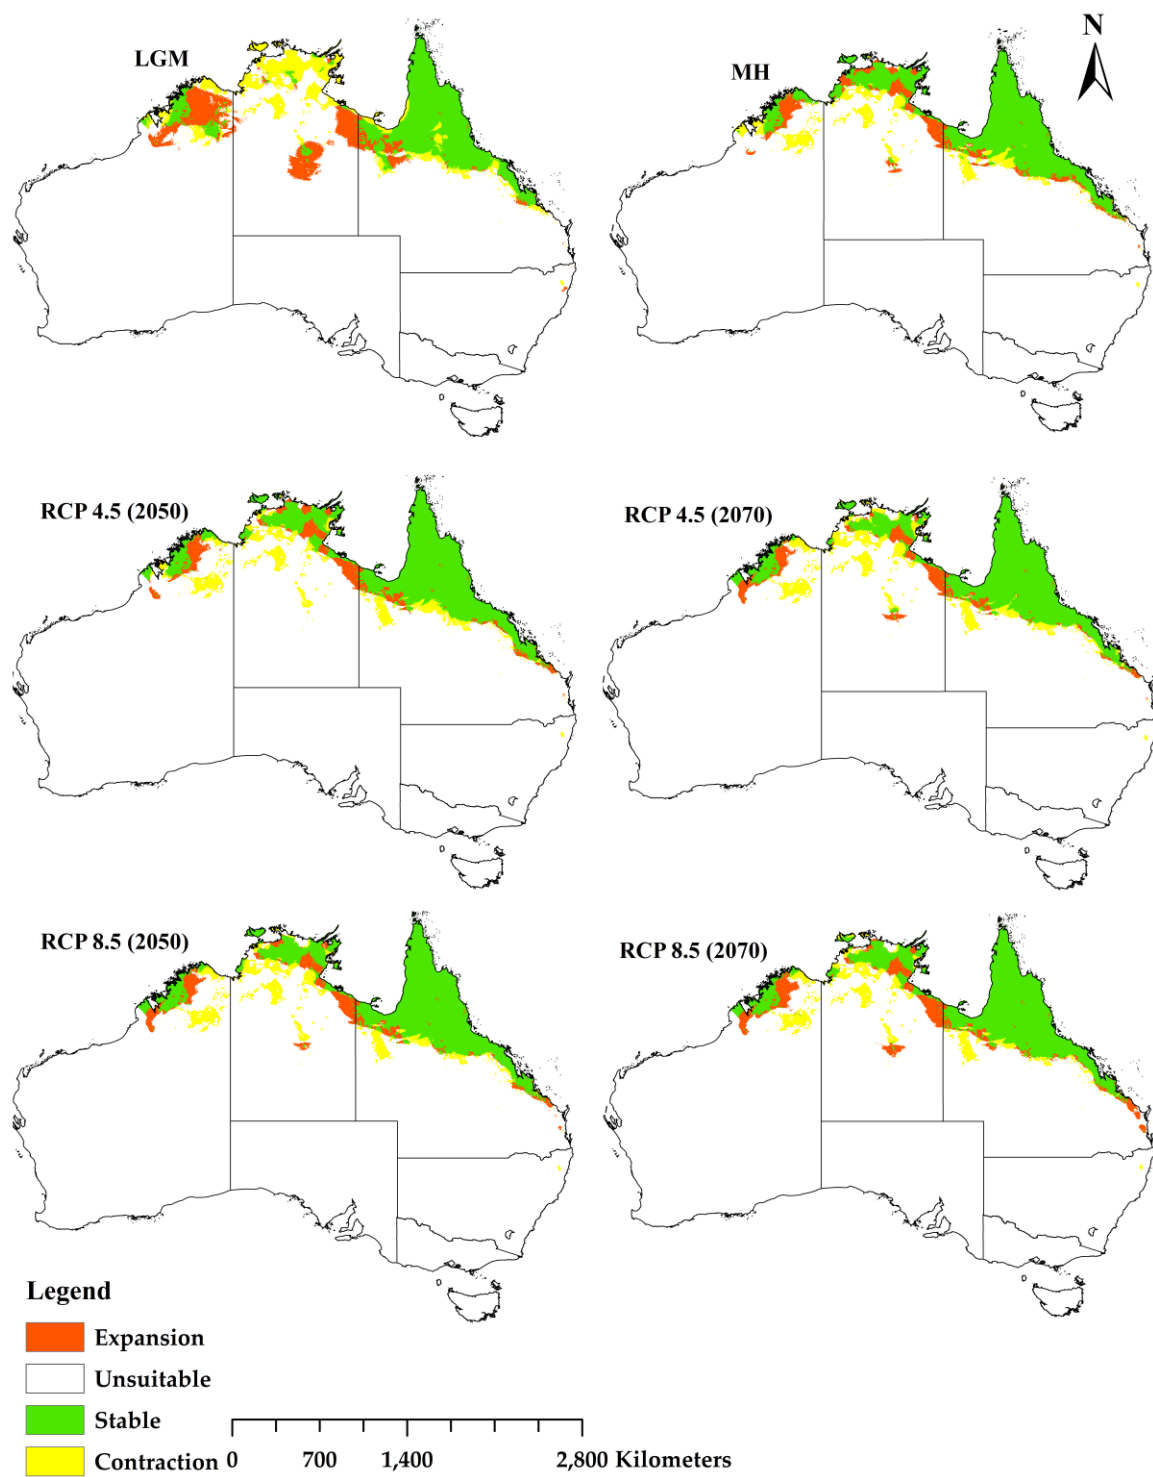

**Figure S4.** *N. immutabilis*.

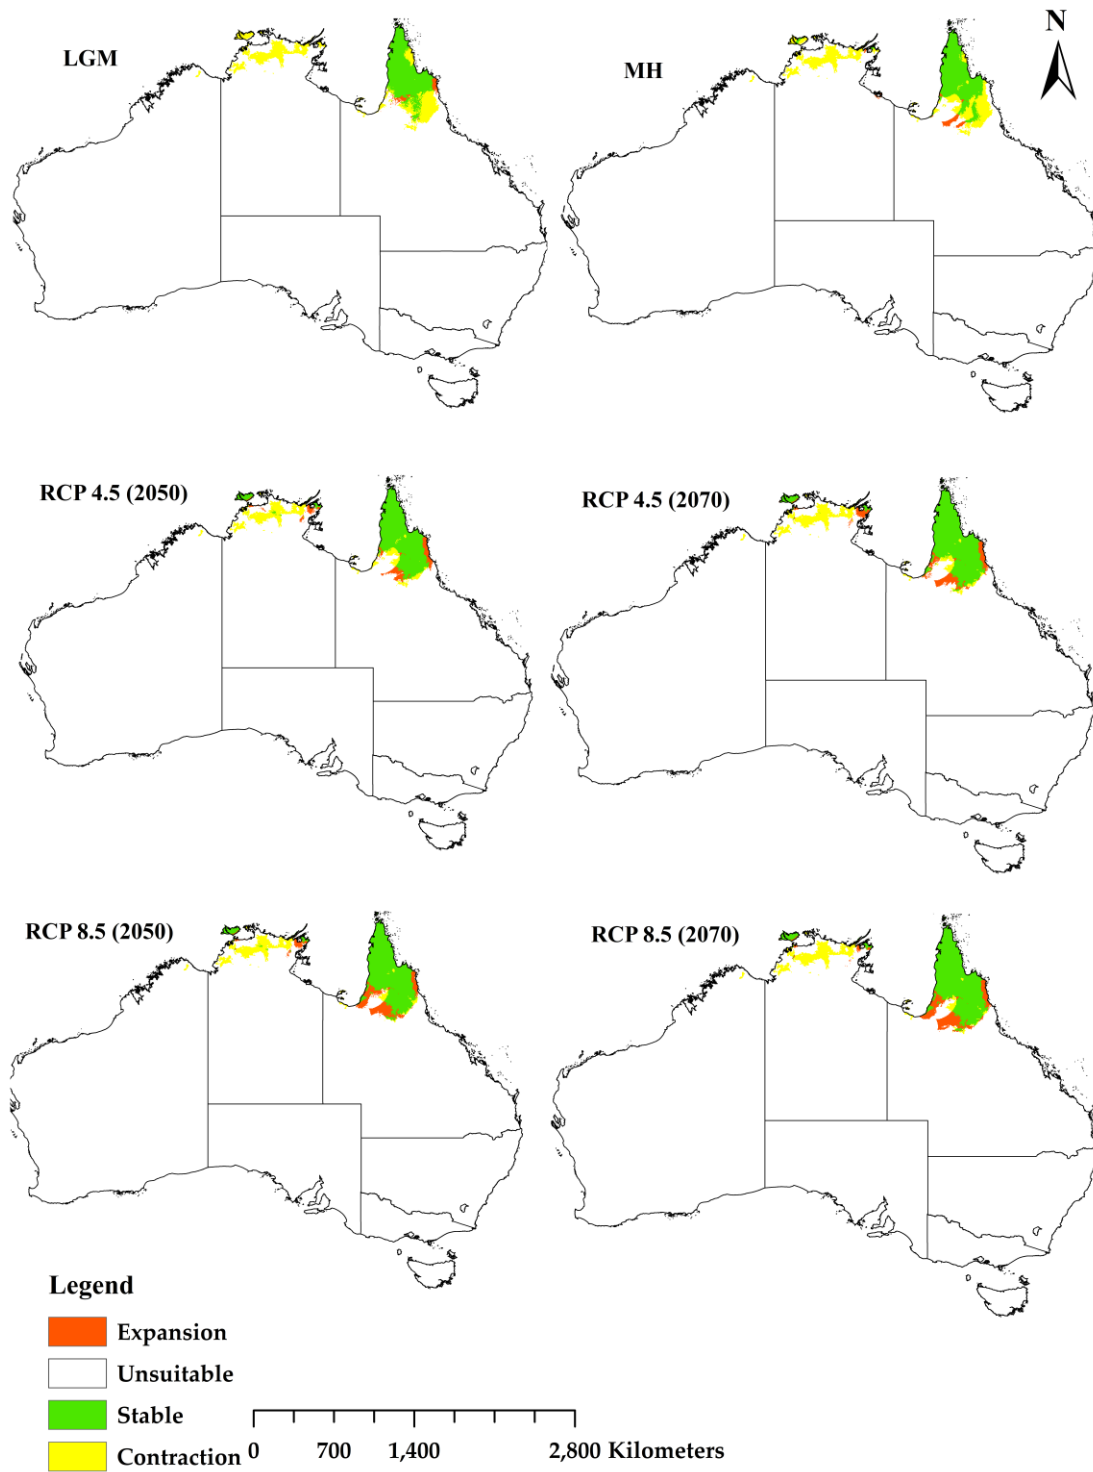

**Figure S5.** *N. atrans*.

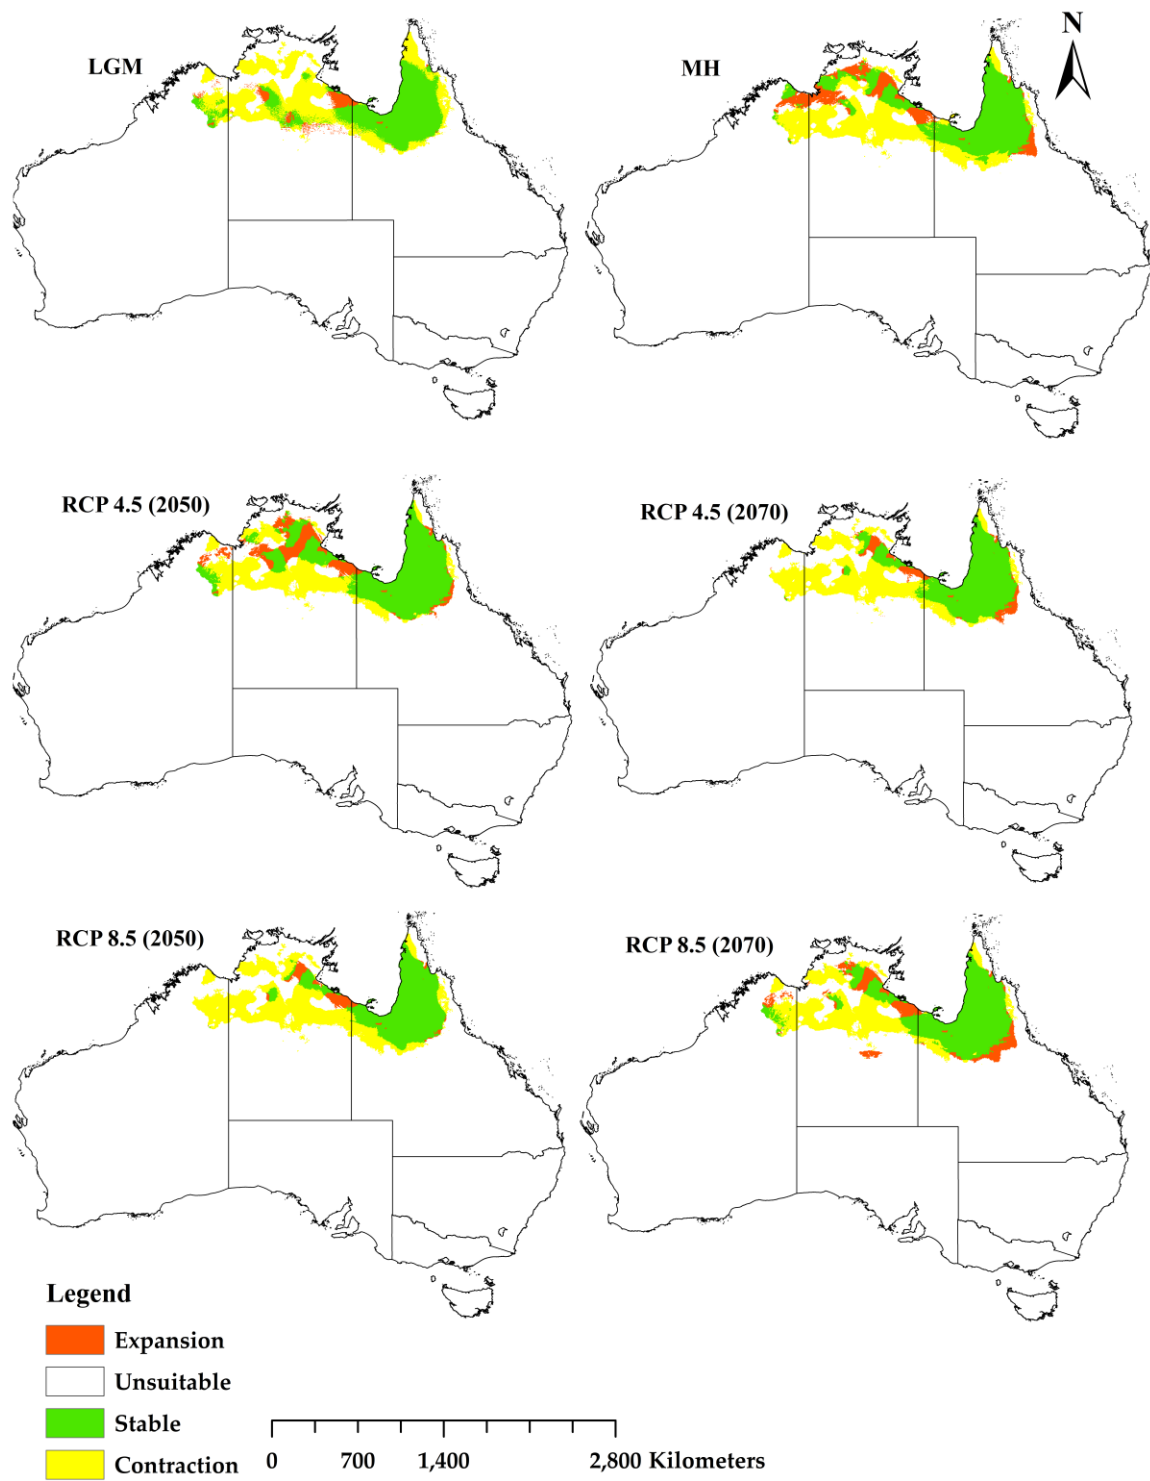

**Figure S6.** *N. carpentariae*.

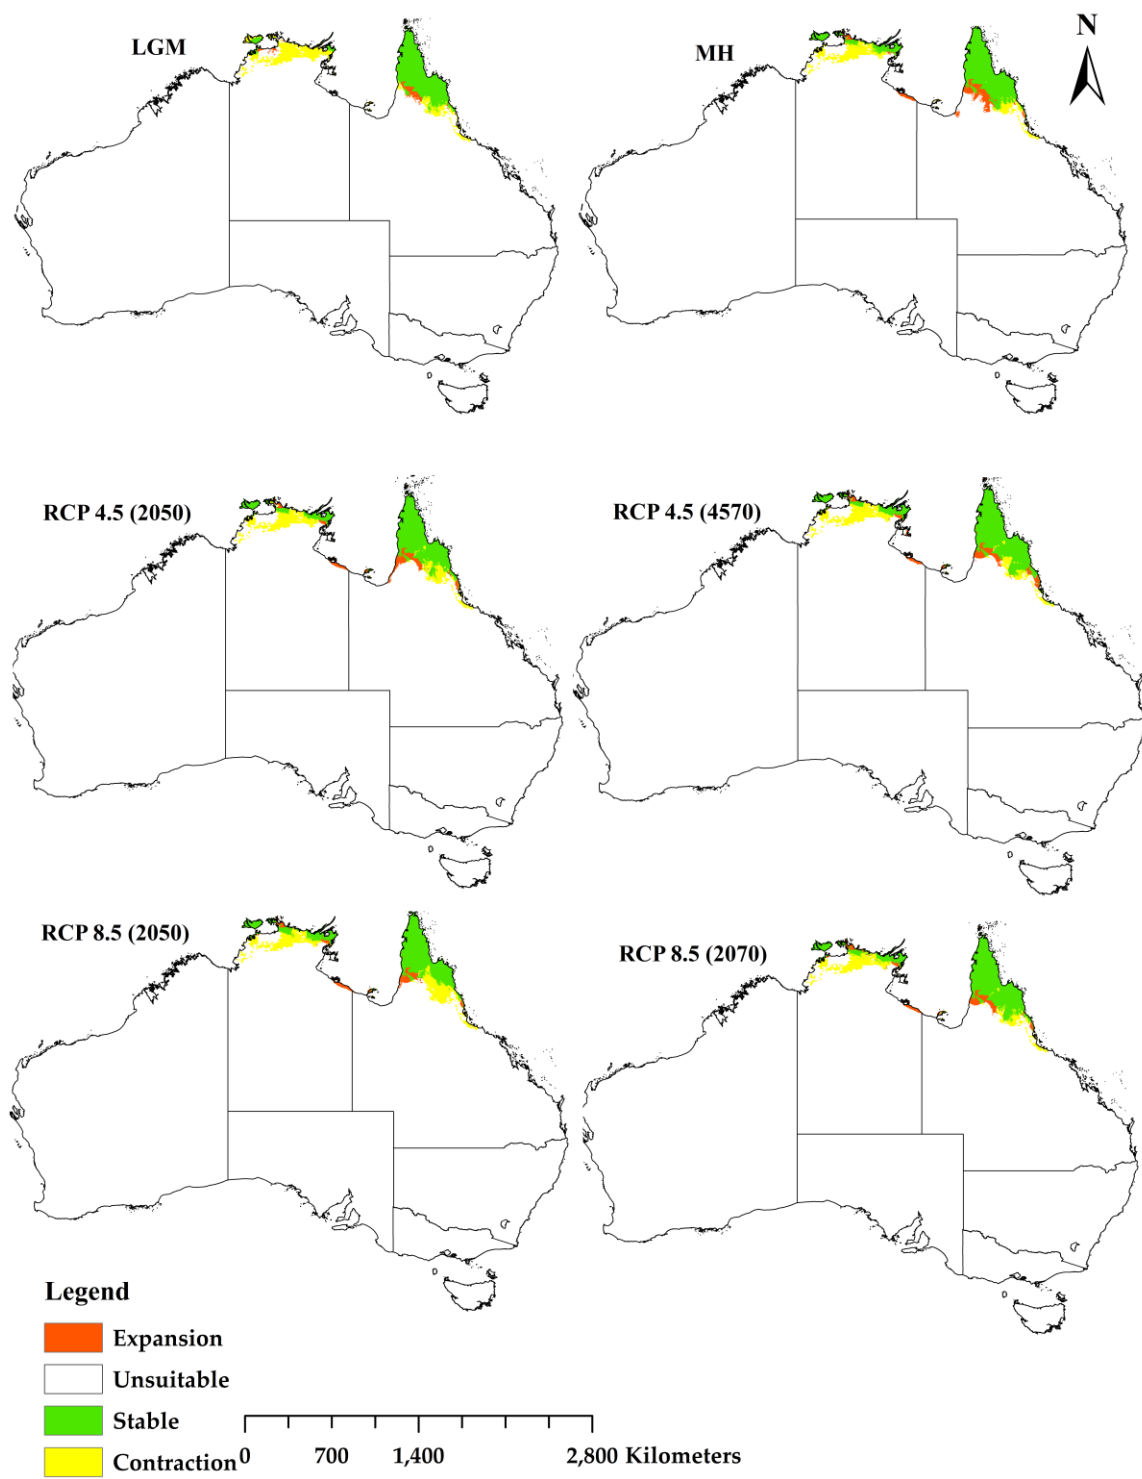

**Figure S7.** *N. elleniae*.

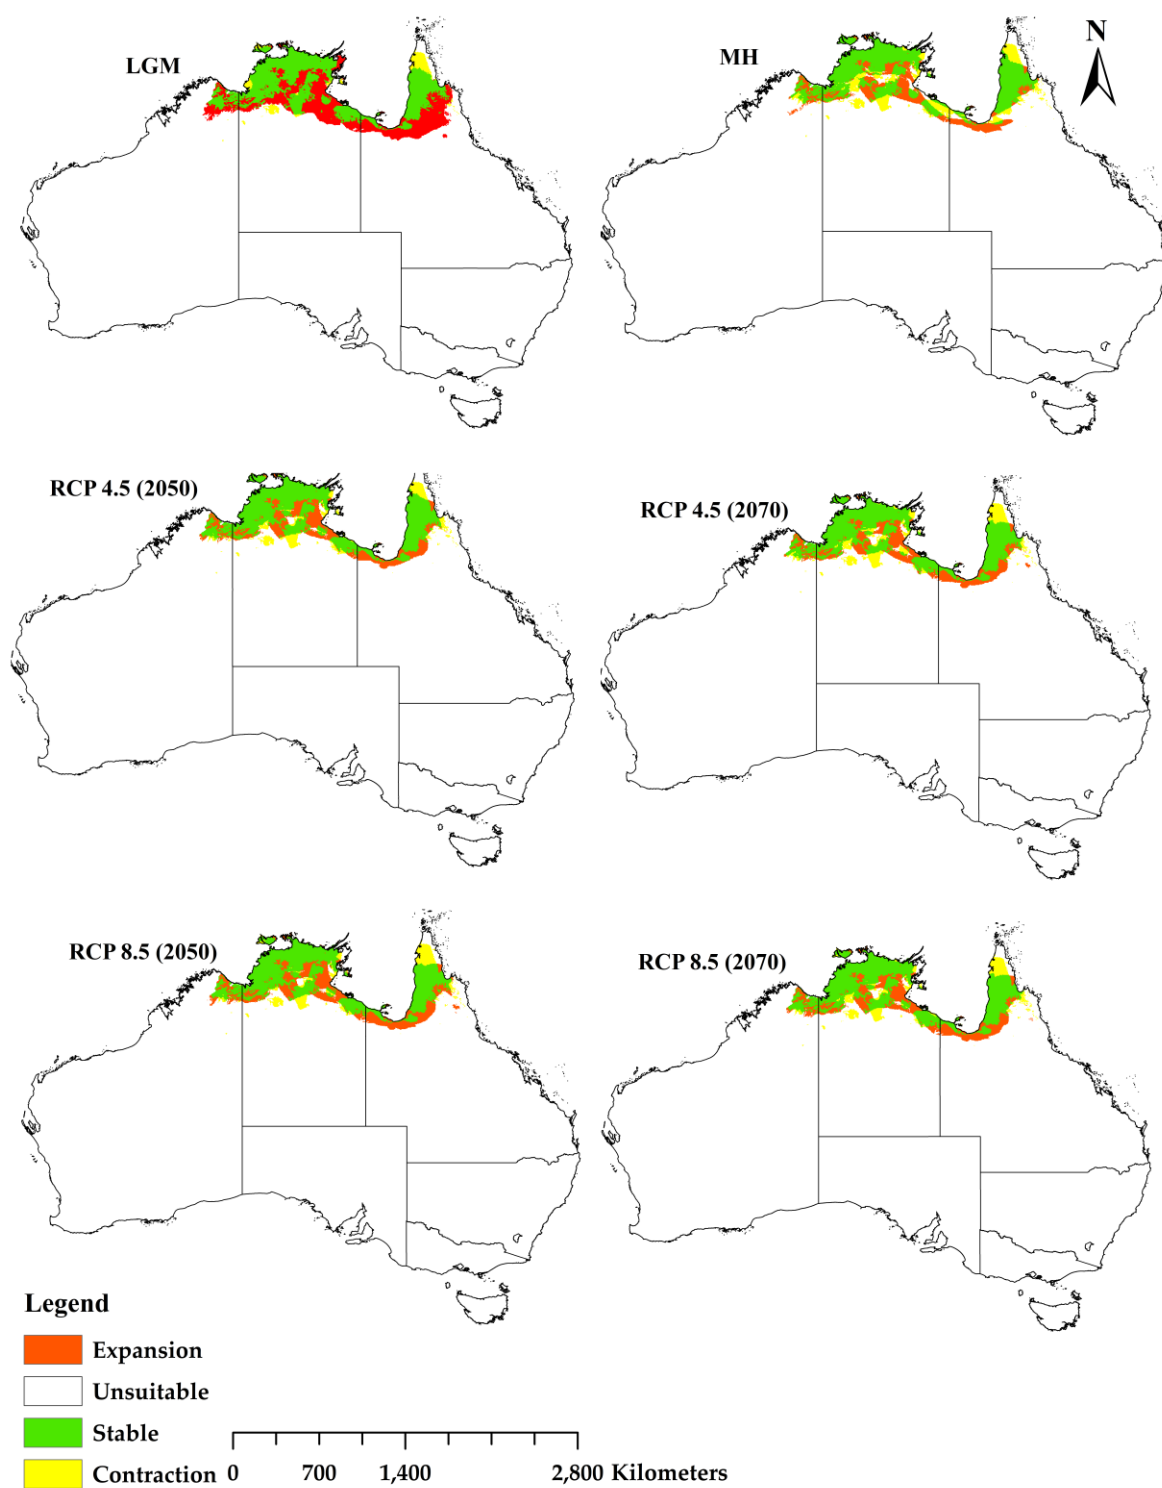

Figure S8. *N. macrosperma*.



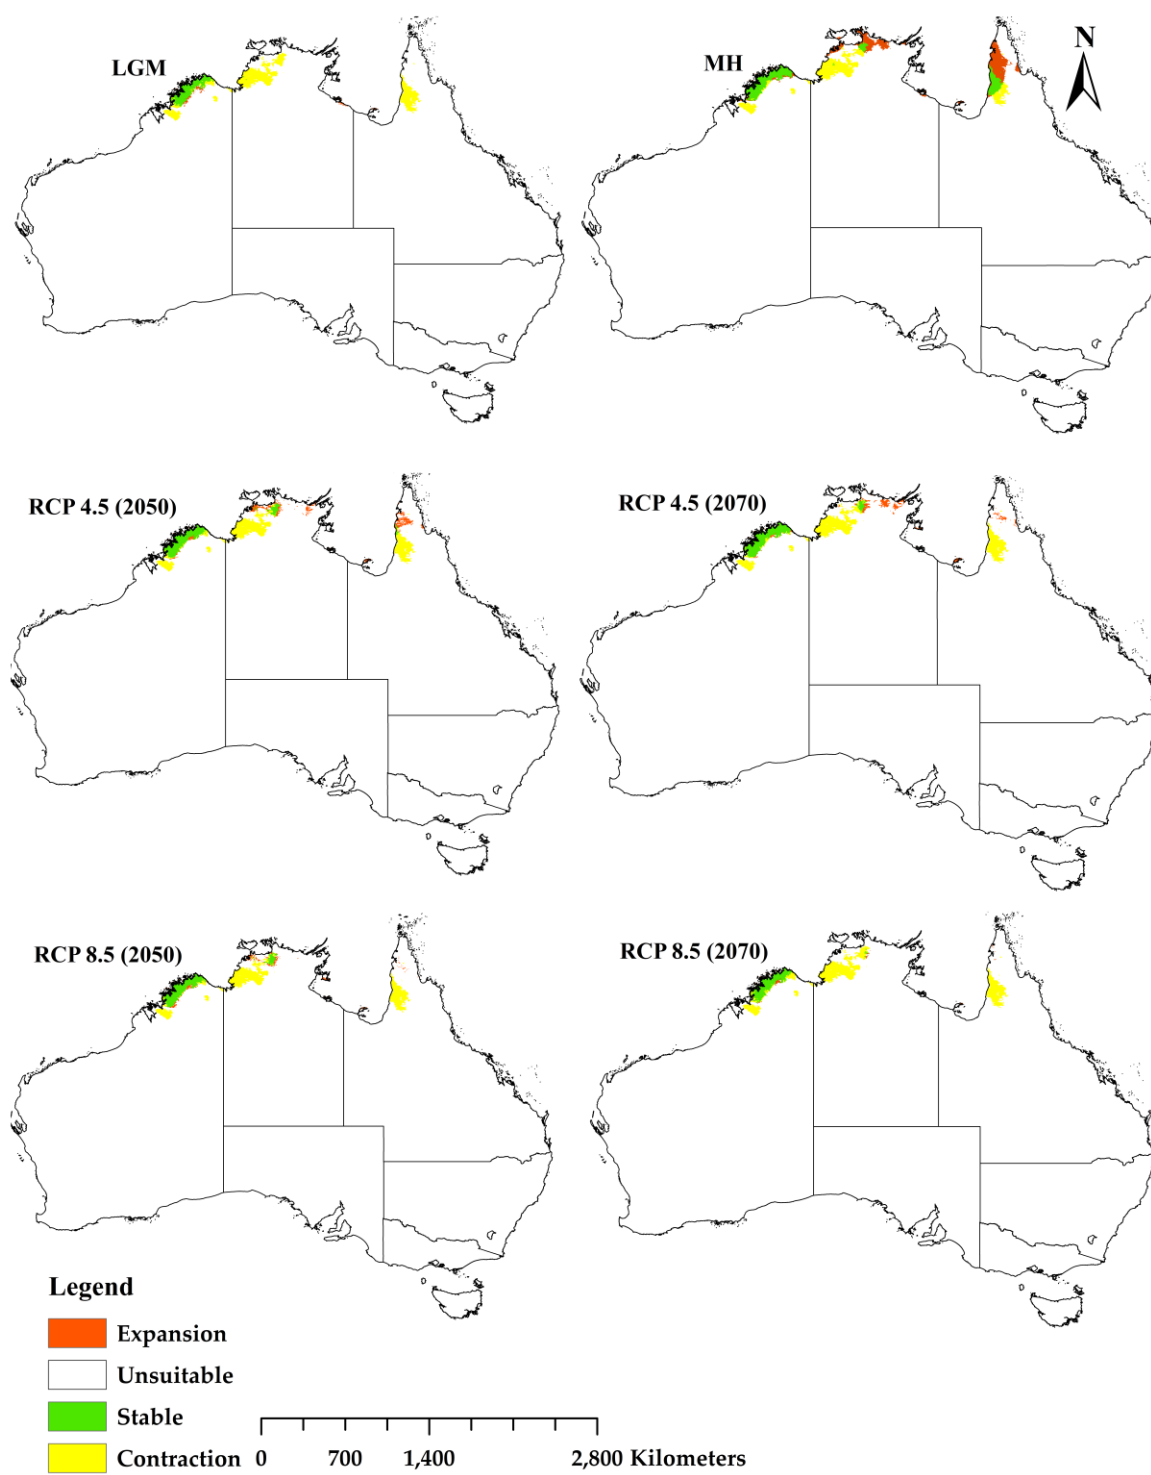

**Figure S9.** *N. ondinea*.

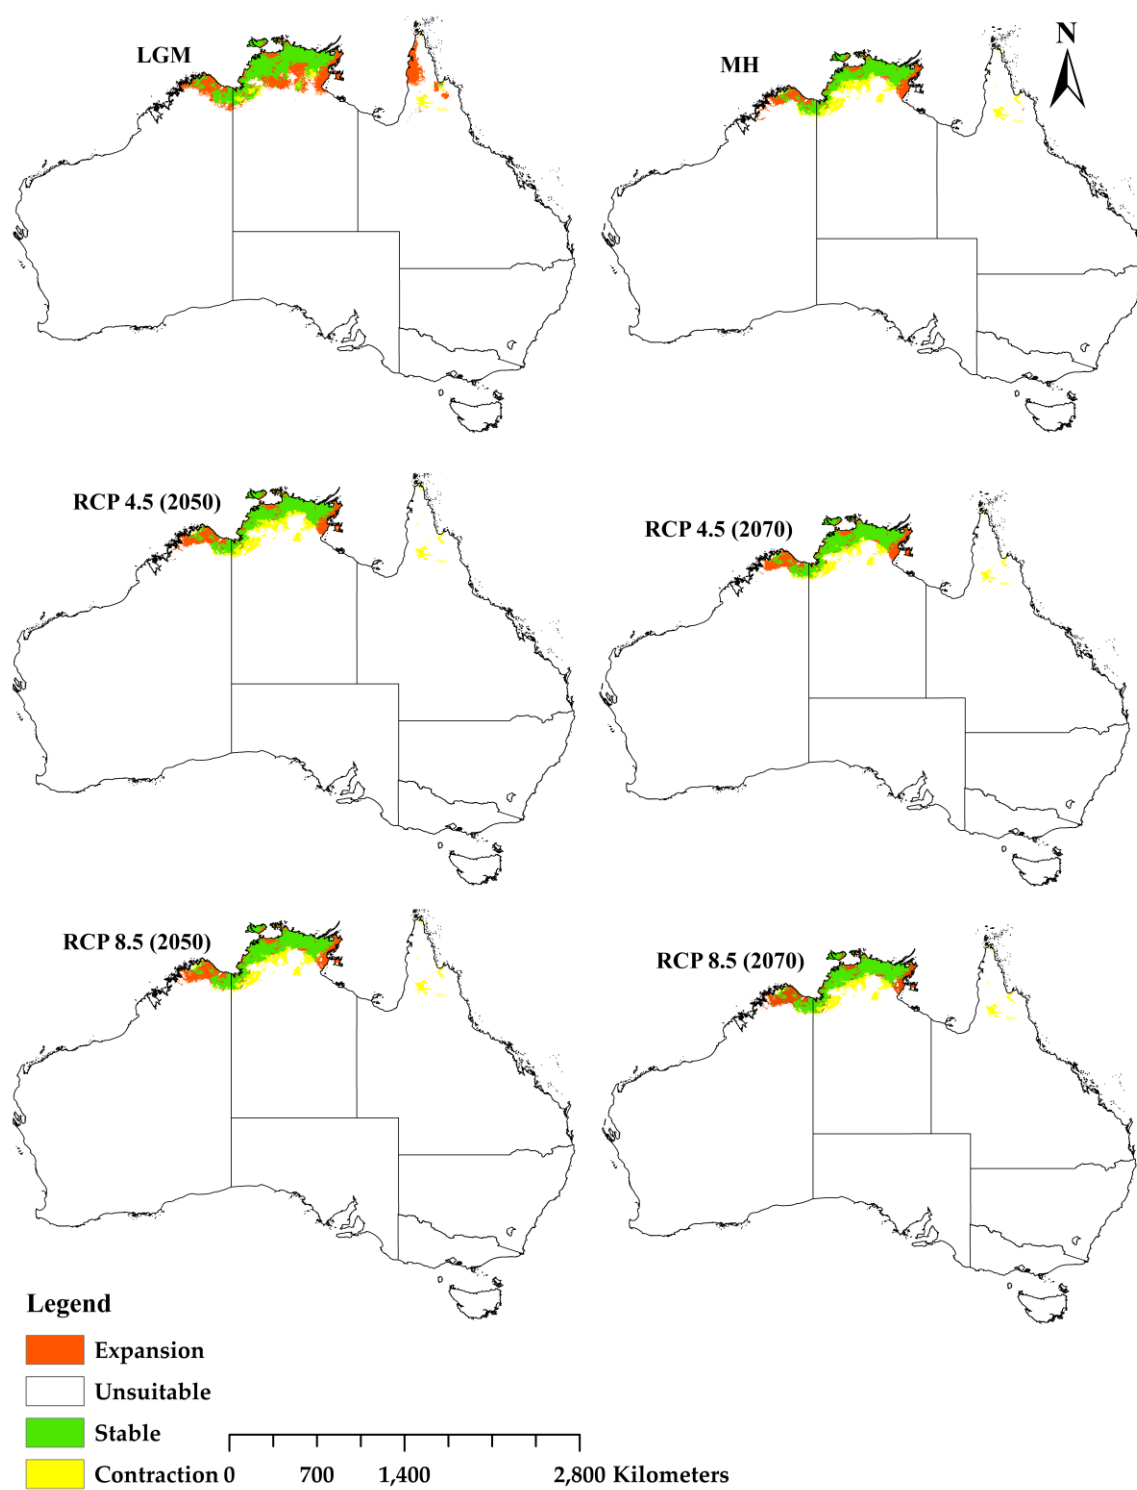

**Figure S10.** *N. hastifolia*.

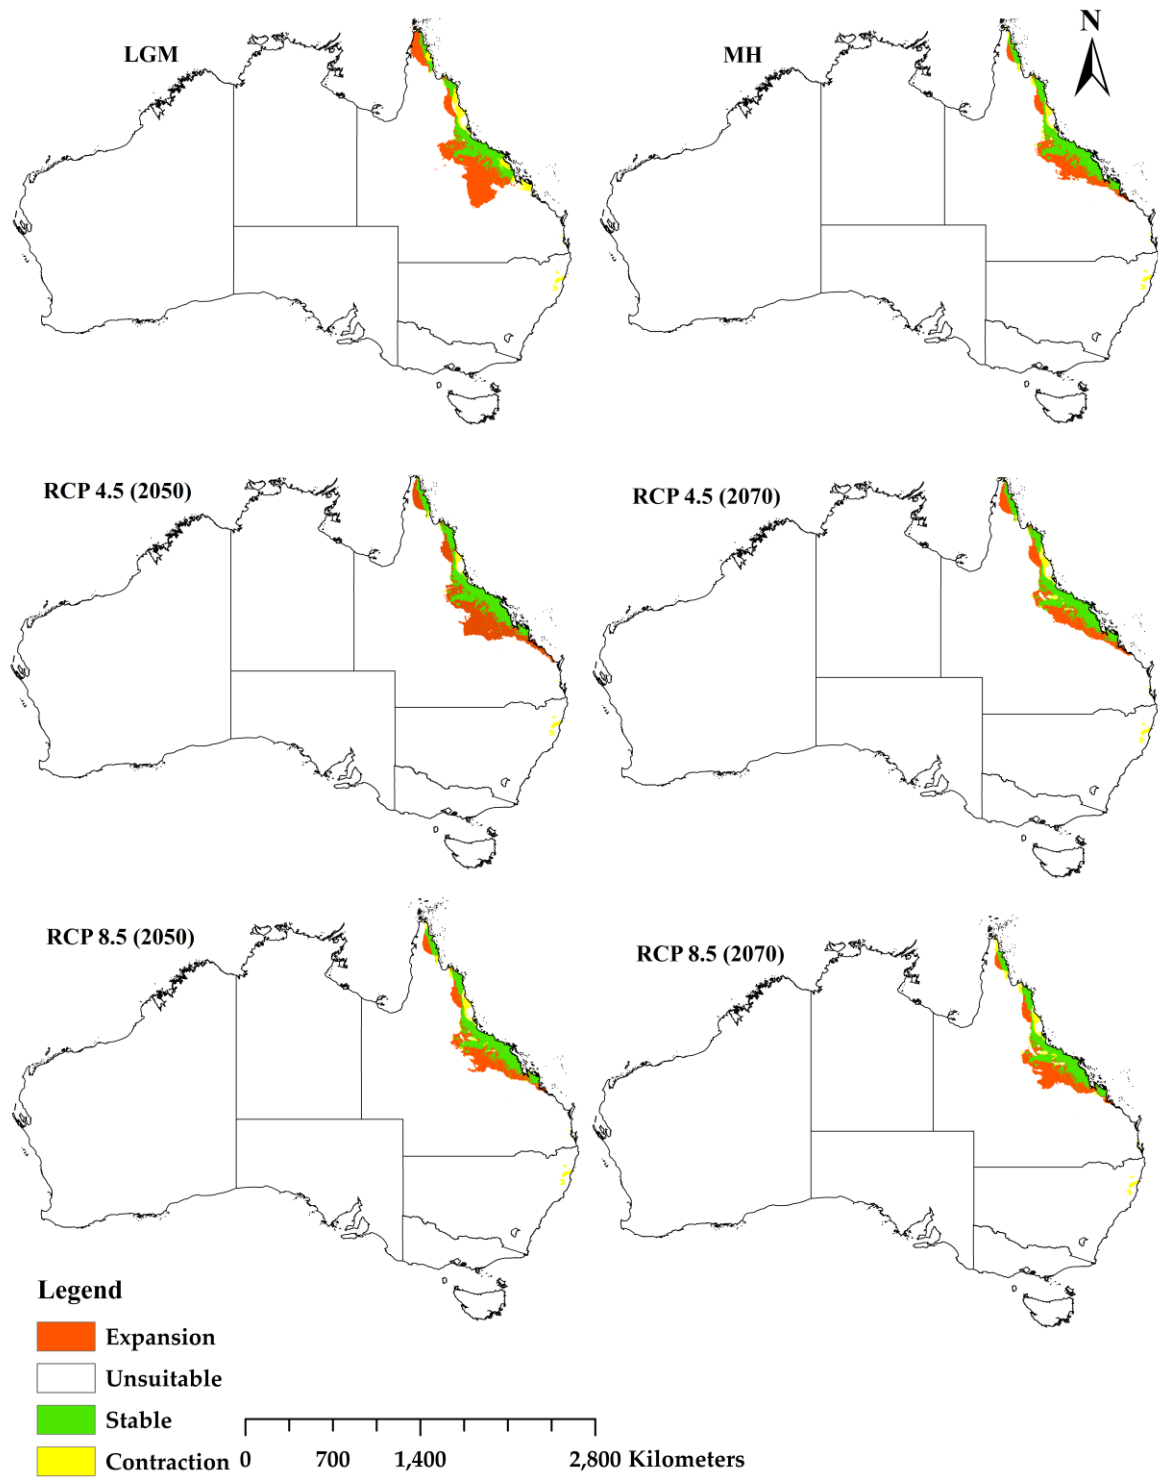

**Figure S11.** *N. jacobsii*.

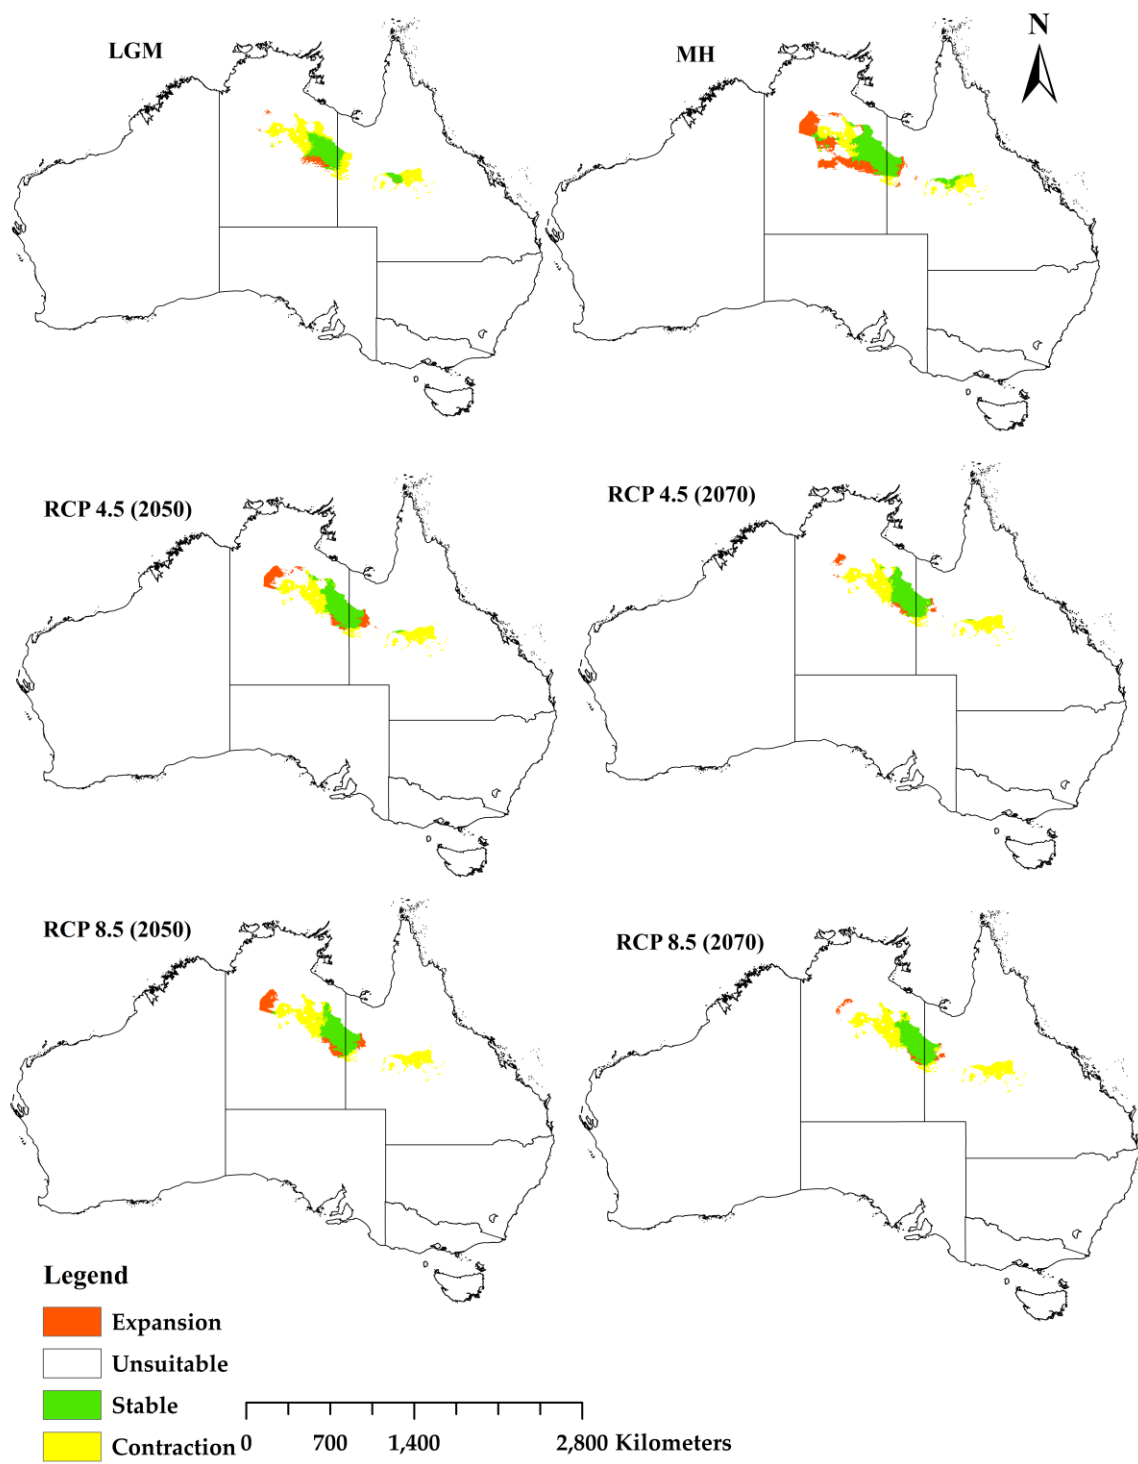

**Figure S12.** *N. georginae*.

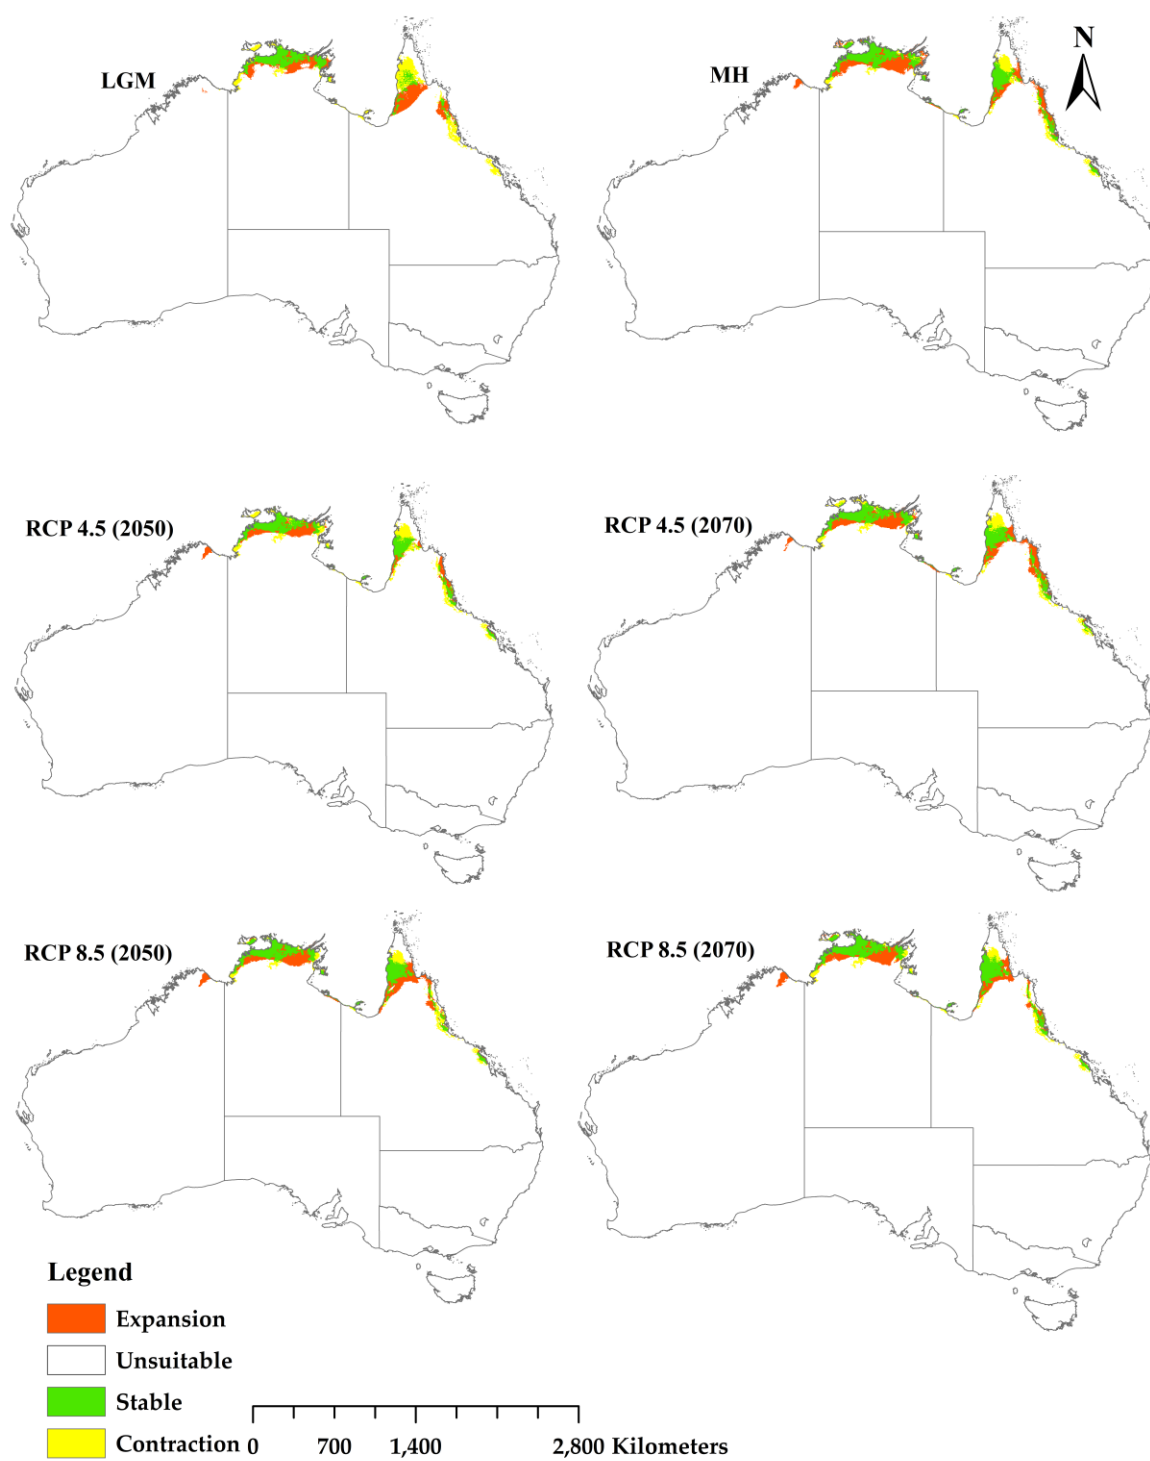

**Figure S13.** *N. pubescens*.

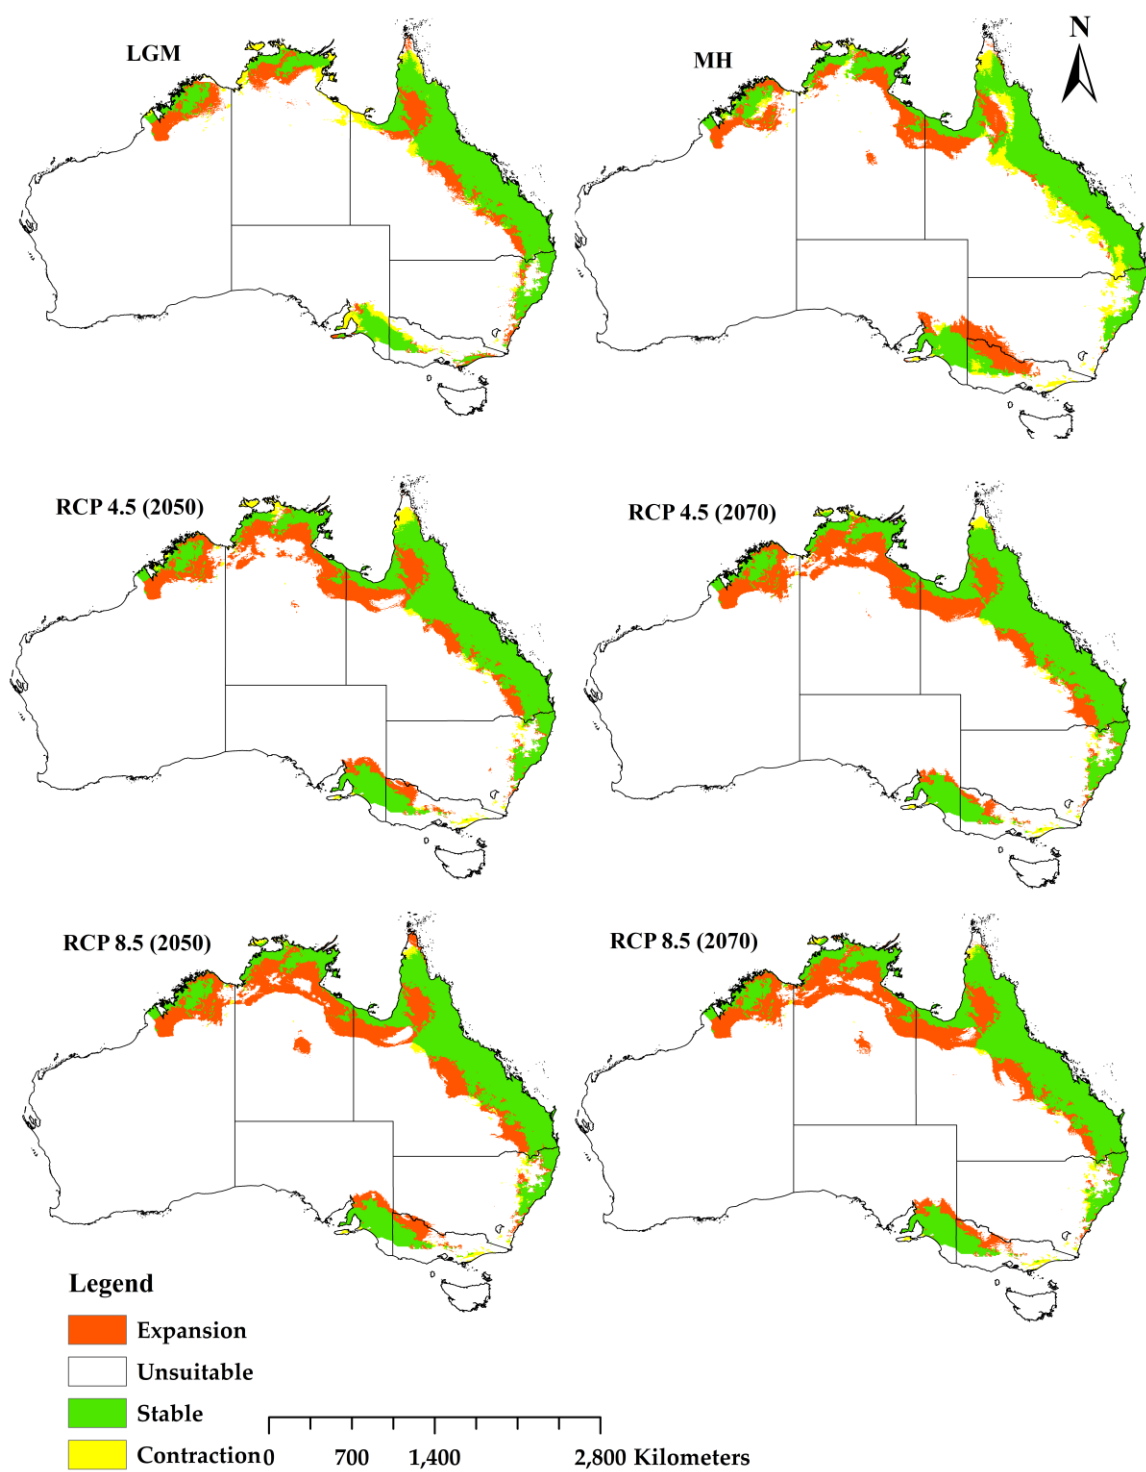

**Figure S14.** *N. gigantea*.
